# Supplementary material for: Exploring sources of biogenic secondary organic aerosol compounds using chemical analysis and the FLEXPART model
Source: Copernicus journal article supplement (doi:10.5194/acp-17-11025-2017), 2017-09-18
Supplement: Supplementary file 1 [file acp-17-11025-2017-supplement.zip]

Archive with 3 entries (3 files):
- Martinsson et al. 2017_BSOA_FLEXPART_Supplemental Information.pdf
- acp-17-11025-2017-supplement-title-page.pdf
- Data_SI.xlsx
