# Supplementary material for: Exploring sources of biogenic secondary organic aerosol compounds using chemical analysis and the FLEXPART model
Source: Copernicus journal article supplement (doi:10.5194/acp-17-11025-2017), 2017-09-18
Supplement: Supplementary file 1 [file acp-17-11025-2017-supplement.zip › acp-17-11025-2017-supplement-title-page.pdf]

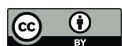

*Supplement of*

## **Exploring sources of biogenic secondary organic aerosol compounds using chemical analysis and the FLEXPART model**

**J. Martinsson et al.**

*Correspondence to:* Johan Martinsson ([johan.martinsson@nuclear.lu.se](mailto:johan.martinsson@nuclear.lu.se))

- [acp-17-11025-2017-supplement-title-page.pdf](#)
- [Data\\_SI.xlsx](#)
- [Martinsson et al. 2017\\_BSOA\\_FLEXPART\\_Supplemental Information.pdf](#)

The copyright of individual parts of the supplement might differ from the CC BY 3.0 License.
